# Supplementary material for: Development of submergence tolerance introgression lines (ILs)-F 5 using major Sub1QTL on chro9 from BRRI dhan52 in rice (Oryza sativa L.) through Marker-Assisted Selection (MAS)
Source: Research Square preprint supplement (doi:10.21203/rs.3.rs-7306050/v1), 2025-10-15
Supplement: Supplementary file 1 [file 1cea256171cc057f1b291672.docx]

Table 1: Extent of heterosis (%) over mid-parent (MPH) and better parent (BPH) for grain yield plant-1 and yield contributing traits in cross combinations of rice.

| Cross combination | Days to maturity | | Effective tiller/Plant | | Filled grain /Panicle | | 1000 Grain weight(g) | | Yield/Plant(g) | |
| --- | --- | --- | --- | --- | --- | --- | --- | --- | --- | --- |
| HMP(%) | HBP(%) | HMP(%) | HBP(%) | HMP(%) | HBP(%) | HMP(%) | HBP(%) | HMP(%) | HBP(%) |
| Binadhan-7 x BRRI dhan52 (F2) | -4.62 | -17.33 | 13.85 | 5.71 | 13.79 | 10.00 | -0.39 | -4.72 | 45.71 | 35.71 |
| Bindhan-17 x BRRI dhan52 (F2) | -7.06 | -16.67 | 23.81 | 8.33 | 34.39 | 20.57 | -0.22 | -8.34 | 37.29 | 28.31 |
| Guti swarna x BRRI dhan52 (F2) | -6.31 | -6.62 | -25.93 | -33.33 | 3.31 | -3.85 | 3.35 | -7.50 | -15.64 | -21.43 |

Table 2: Submergence tolerance screening of heterozygous plants from three crosses including Binadhan-7 (P1)/ BRRI dhan52 (P2), Binadhan-17 (P1)/ BRRI dhan52 (P2) and Guti Swarna(P1)/ BRRI dhan52(P2).

| SL# | Plant numbers | Banding score | Phenotype | Banding score | Phenotype | Banding score | Phenotype |
| --- | --- | --- | --- | --- | --- | --- | --- |
| Binadhan-7 / BRRI dhan52 | Survival% | Binadhan-17/ BRRI dhan52 | Survival% | Guti Swarna/ BRRI dhan52 | Survival% |
| 1 | P1 | 1 | 0.00 | 1 | 0.00 | 1 | 0.00 |
| 2 | P2 | 2 | 69.50 | 2 | 69.50 | 2 | 69.50 |
| 3 | F2-1 | 0 | 0.00 | 0 | 0.00 | 0 | 0.00 |
| 4 | F2-2 | 3 | 32.50 | 3 | 34.50 | 3 | 63.25 |
| 5 | F2-3 | 3 | 38.25 | 3 | 55.25 | 0 | 0.00 |
| 6 | F2-4 | 3 | 31.50 | 3 | 42.75 | 3 | 58.50 |
| 7 | F2-5 | 3 | 35.75 | 3 | 41.25 | 3 | 29.50 |
| 8 | F2-6 | 3 | 44.25 | 3 | 32.75 | 1 | 0.00 |
| 9 | F2-7 | 3 | 67.50 | 3 | 35.25 | 3 | 33.50 |
| 10 | F2-8 | 0 | 0.00 | 0 | 0.00 | 0 | 0.00 |
| 11 | F2-9 | 3 | 61.50 | 0 | 0.00 | 3 | 44.75 |
| 12 | F2-10 | 0 | 0.00 | 3 | 53.50 | 3 | 59.50 |
| 13 | F2-11 | 3 | 66.75 | 3 | 39.75 | 0 | 0.00 |
| 14 | F2-12 | 3 | 59.25 | 3 | 68.25 | 0 | 0.00 |
| 15 | F2-13 | 3 | 53.50 | 3 | 65.75 | 3 | 34.50 |
| 17 | F2-14 | 0 | 0.00 | 0 | 0.00 | 3 | 55.75 |
| 18 | F2-15 | 3 | 57.50 | 3 | 59.50 | 0 | 0.00 |
| Ave. | |  | 49.81 |  | 49.84 |  | 47.40 |

**Here, P1=Female parent (Homozygous band =1), P2=Donor parent (Homozygous band =2), F1= Heterozygous plant (3) and No Band=0**

Table 3: Screening of different plants (sub1 lines) from three cross combinations (F3) for submergence tolerance at 48 DAT vegetative stage in artificial tank

| SL# | Plant numbers | Binadhan-7 / BRRI dhan52 | Binadhan-17/ BRRI dhan52 | Guti Swarna/ BRRI dhan52 | Vegetative stage | Submerged durations (Days) | Average water depth (cm) |
| --- | --- | --- | --- | --- | --- | --- | --- |
| Survival (%) | Survival (%) | Survival (%) |  |  |  |
| 1 | P1 | 0.00 | 0.00 | 0.00 | 48 DAT | 21 days | 88 cm |
| 2 | P2 | 66.25 | 66.25 | 66.25 | 48 DAT | 21 days | 88 cm |
| 3 | F3-1 | - | - | - | - | - | - |
| 4 | F3-2 | 65.25 | 81.25 | 84.75 | 48 DAT | 21 days | 88 cm |
| 5 | F3-3 | 85.25 | 68.75 | - | 48 DAT | 21 days | 88 cm |
| 6 | F3-4 | 70.50 | 87.75 | 77.75 | 48 DAT | 21 days | 88 cm |
| 7 | F3-5 | 55.75 | 67.25 | 81.25 | 48 DAT | 21 days | 88 cm |
| 8 | F3-6 | 71.25 | 59.25 | - | 48 DAT | 21 days | 88 cm |
| 9 | F3-7 | 92.25 | 72.25 | 64.75 | 48 DAT | 21 days | 88 cm |
| 10 | F3-8 | - | - | - | - | - | - |
| 11 | F3-9 | 90.25 | - | 75.25 | 48 DAT | 21 days | 88 cm |
| 12 | F3-10 | - | 69.00 | 85.25 | 48 DAT | 21 days | 88 cm |
| 13 | F3-11 | 93.25 | 75.25 | - | 48 DAT | 21 days | 88 cm |
| 14 | F3-12 | 91.25 | 93.25 | - | 48 DAT | 21 days | 88 cm |
| 15 | F3-13 | 87.75 | 92.75 | 67.25 | 48 DAT | 21 days | 88 cm |
| 17 | F3-14 | - | - | 71.25 | 48 DAT | 21 days | 88 cm |
| 18 | F3-15 | 77.25 | 94.25 | - | 48 DAT | 21 days | 88 cm |

Table 4: Performance of submergence tolerant lines and selected reference and checks under non-flooded conditions. Data were average from three trials of three replications at the location BINA, Mymensingh. Twenty-one days of control submergence with water depth 78 cm was imposed of artificial tank at BINA HQ.

| Cross combinations | Pedigree number/  Designations | Gen | Growth durations (D) | Plant height  (cm) | No. of panicles  /plant | Filled grain /panicle | Sterility  /panicle | Thousand grain wt. (g) | Grain yield  /plant(g) |
| --- | --- | --- | --- | --- | --- | --- | --- | --- | --- |
| **Crossing materials** | BPR21-1-S | 1 | 123 h | 98.33 f | 15.33 a-d | 96.00 j | 45.66 e | 21.12 fg | 25.64 g |
| BPR21-2-S | 2 | 124 gh | 106.00 e | 14.33 b-e | 132.66 g | 51.00 d | 20.72 g | 27.00 g |
| BPR21-S-S | 3 | 122 hi | 106.00 e | 14.66 a-e | 144.00 f | 60.00 b | 21.43 e-g | 40.20 c |
| **BPR21-S-M** | **4** | **123 h** | **104.00 e** | **15.33 a-d** | **161.00 d** | **56.00 c** | **21.95 de** | **42.00 bc** |
| BPR22-1-S | 5 | 126 g | 113.33 c | 11.00 fg | 144.66 f | 25.33 g | 23.78 c | 37.83 d |
| **BPR22-2-S** | 6 | **133 ef** | **132.00 a** | **14.33 b-e** | **156.33 e** | **15.00 i** | **23.85 bc** | **45.53 a** |
| BPR22-S-S | **7** | 131 f | 129.00 b | 12.33 e-g | 110.00 i | 13.33 i | 24.66 b | 42.69 b |
| BPR17-S-17 | 8 | 135 de | 113.66 c | 14.00 c-e | 198.00 a | 46.33 e | 23.81 c | 34.83 e |
| **BPR17-S-M** | **9** | **137 d** | **131.33 ab** | **15.66 a-c** | **195.00 a** | **35.00 f** | **23.68 c** | **36.78 de** |
| **Mutants** | GS-M5-P-2 | 10 | 145 b | 109.00 d | 16.66 ab | 177.00 b | 13.66 i | 21.81 ef | 31.46 f |
| MS-M5-P-8 | 11 | 142 c | 115.66 c | 15.00 a-d | 154.00 e | 14.33 i | 22.78 d | 30.20 f |
| **Parents** | BRRI dhan52(p) | 12 | 148 ab | 115.33 c | 13.33 c-f | 129.00 h | 37.66 f | 25.58 a | 30.16 f |
| Binadhan-7 (p) | 13 | 114 j | 95.33 g | 17.00 a | 81.00 k | 20.33 h | 21.44 e-g | 25.76 g |
| Binadhan-17 (p) | 14 | 120 i | 101.00 f | 10.00 g | 166.00 c | 73.00 a | 19.66 h | 21.80 h |
| Guti Swarna (p) | 15 | 150 a | 114.00 c | 13.00 d-f | 156.00 e | 53.00 cd | 19.61 h | 29.47 f |

**Note:** Similar letter indicates there is no significant difference at 5% level of probability whereas different letter indicates significant difference at 5% level of probability.

# Gen (1-9) have sub1, Gen (10-11) have mutant sub1, Gen (12) have sub1 parent and Gen (13-15) don’t have sub1 but HYV

# Gen (1-9) –F5 generations, Gen (10-11) –M5 generations, Gen (12) have sub1 parent and Gen (13-15) for HYV

# Field tested sub1 lines Gen (4, 6 & 9) with Blue Bold were good performance under control conditions

Table 5: Performance of *Sub1*-lines under flooded conditions in the farmer’s field. Data were average of three replications from three trials at the location of natural submergence field in the submergence prone areas famers field such as Jamalpur district, Rangpur district and Kurigram district.

| Cross combination | Pedigree number  /Designations | Gen | Growth duration (D) | Plant height (cm) | No. of panicle /plant | Filled grain  /panicle | Sterility  /panicle | Thousand grain wt.  (g) | Grain yield /plant(g) |
| --- | --- | --- | --- | --- | --- | --- | --- | --- | --- |
| **Crossing materials** | BPR21-1-S | 1 | 146.11 e | 77.77 h | 8.22 d-g | 63.44 g | 72.44 b | 22.27 e | 9.95 g |
| BPR21-2-S | 2 | 147.22 de | 88.00 g | 10.11 bc | 68.66 f | 69.33 c | 22.61 e | 12.68 f |
| BPR21-S-S | 3 | 143.00 f | 90.00 fg | 10.11 bc | 104.00 c | 65.66 d | 22.53 e | 14.41 d |
| **BPR21-S-M** | **4** | **137.77 g** | **91.66 ef** | **11.77 a** | **114.00 a** | **70.66 bc** | **22.23 e** | **19.33 b** |
| BPR22-1-S | 5 | 145.66 e | 93.77 e | 6.88 g | 63.11 g | 34.22 h | 23.70 d | 9.44 g |
| BPR22-2-S | 6 | 148.77 cd | 96.11 d | 8.33 d-f | 92.88 e | 56.88 f | 23.78 cd | 12.75 f |
| **BPR22-S-S** | **7** | **141.66 f** | **107.44 b** | **10.66 ab** | **107.66 b** | **59.44 e** | **24.46 bc** | **20.23 a** |
| BPR17-S-17 | 8 | 150.55 c | 91.22 f | 8.88 c-e | 109.00 b | 75.77 a | 23.99 b-d | 12.13 f |
| **BPR17-S-M** | **9** | **148.33 d** | **112.33 b** | **10.66 ab** | **111.00 ab** | **72.00 b** | **24.53 b** | **15.26 c** |
| **Mutants** | GS-M5-P-2 | 10 | 160.33 ab | 93.77 e | 10.00 bc | 100.66 c | 54.00 g | 22.59 e | 14.57 d |
| MS-M5-P-8 | 11 | 158.33 b | 103.00 c | 7.44 fg | 94.22 de | 53.22 g | 23.48 d | 13.41 e |
| **Parent** | BRRI dhan52 | 12 | 161.66 a | 113.66 a | 9.66 b-d | 97.00 d | 28.00 i | 25.72 a | 12.71 f |

**Note**: Similar letter indicates there is no significant difference at 5% level of probability whereas different letter indicates significant difference at 5% level of probability.

# Gen (1-9) have *Sub1*, Gen (10-11) have mutant sub1 and Gen (12) have sub1 parent

# Gen (1-9) –F5 generations, Gen (10-11) –M5 generations and Gen (12) have sub1 parent

# Field tested *Sub1* lines Gen (4, 7 & 9) with Blue Bold have very good recovery status
