# Supplementary material for: Development of submergence tolerance introgression lines (ILs)-F 5 using major Sub1QTL on chro9 from BRRI dhan52 in rice (Oryza sativa L.) through Marker-Assisted Selection (MAS)
Source: Research Square preprint supplement (doi:10.21203/rs.3.rs-7306050/v1), 2025-10-15
Supplement: Supplementary file 2 [file 4e917e5a495362dbe34e3321.docx]

**
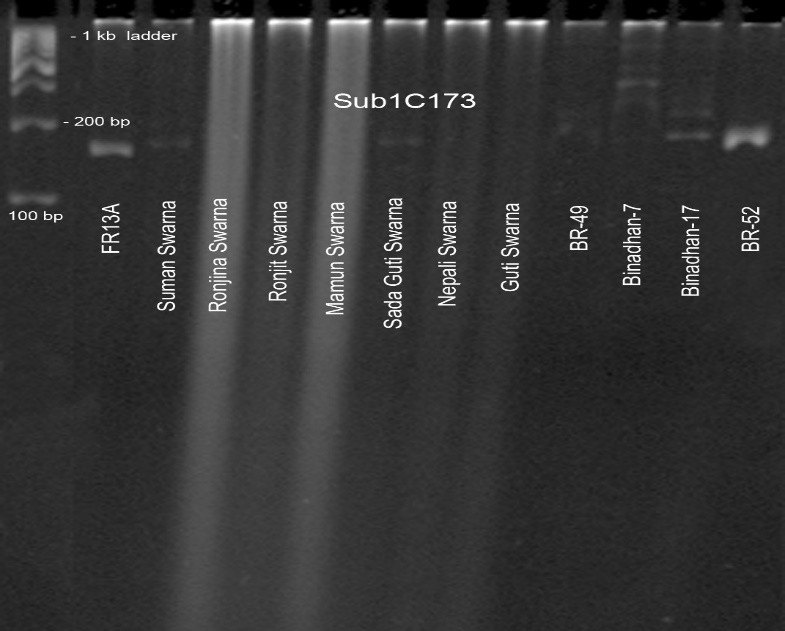
**

Figure S1. Germplasm screening of submergence tolerant local variety and HYV using Sub1C173 through PAGE.


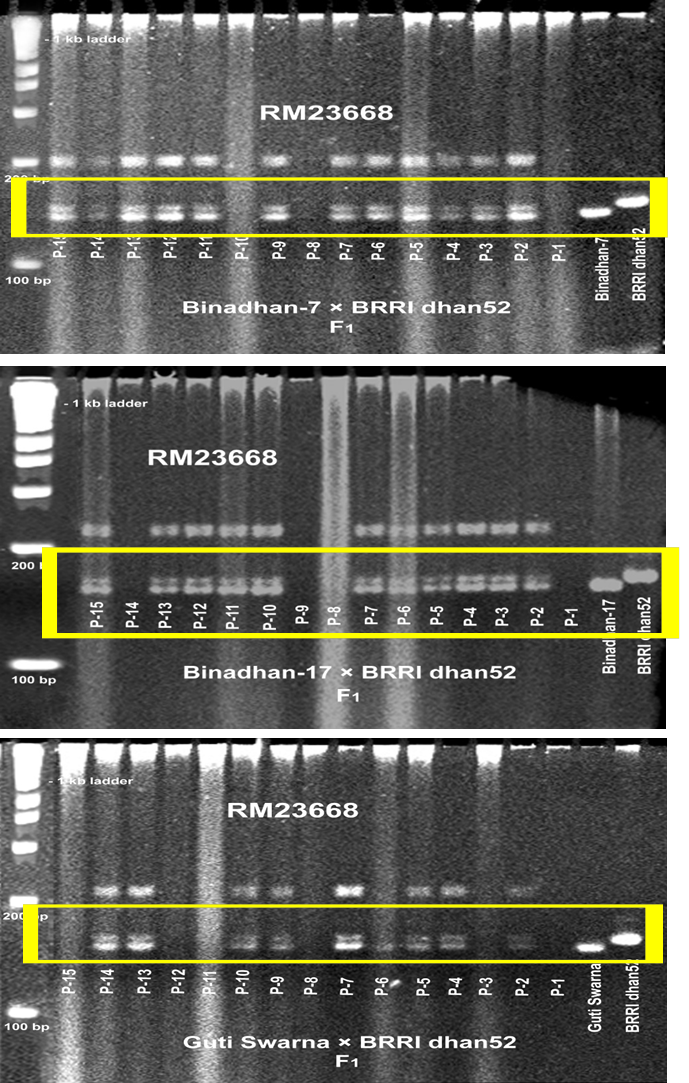


**Fig. 2: Ethylene mediated physiological mechanism of submergence tolerant genotypes in rice**

Figure S2: Confirmation of F1 obtained from the crosses following PCR amplification with RM23668 primer.


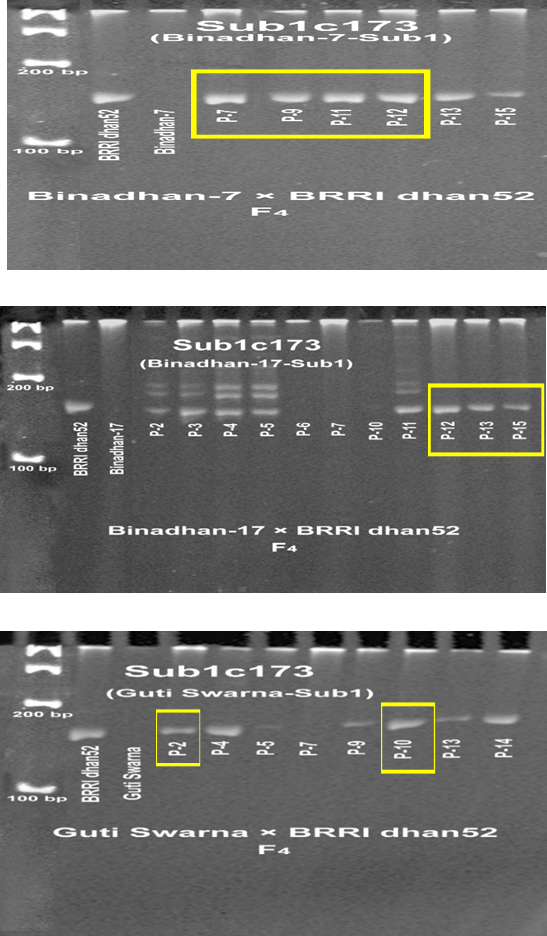


Figure S3: Confirmation of *Sub1* genes in F4 generations of three cross combinations using gene specific primer (Sub1c173) on PAGE.


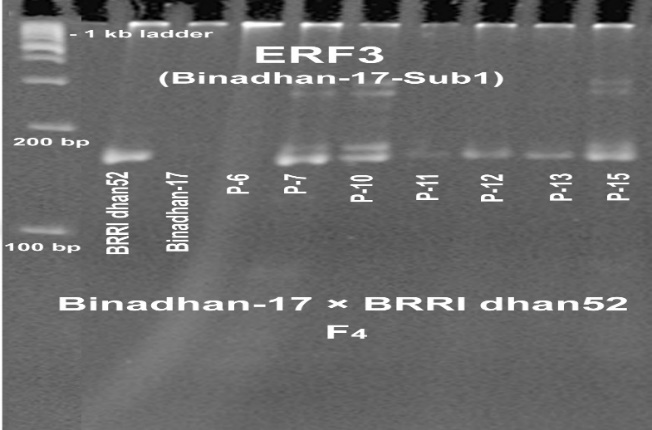


Figure S4: Sub1 gene confirmation of Binadhan-17×BRRI dhan52 (F4) generations (7 plants) using gene specific primer (ERF3) through PAGE

**
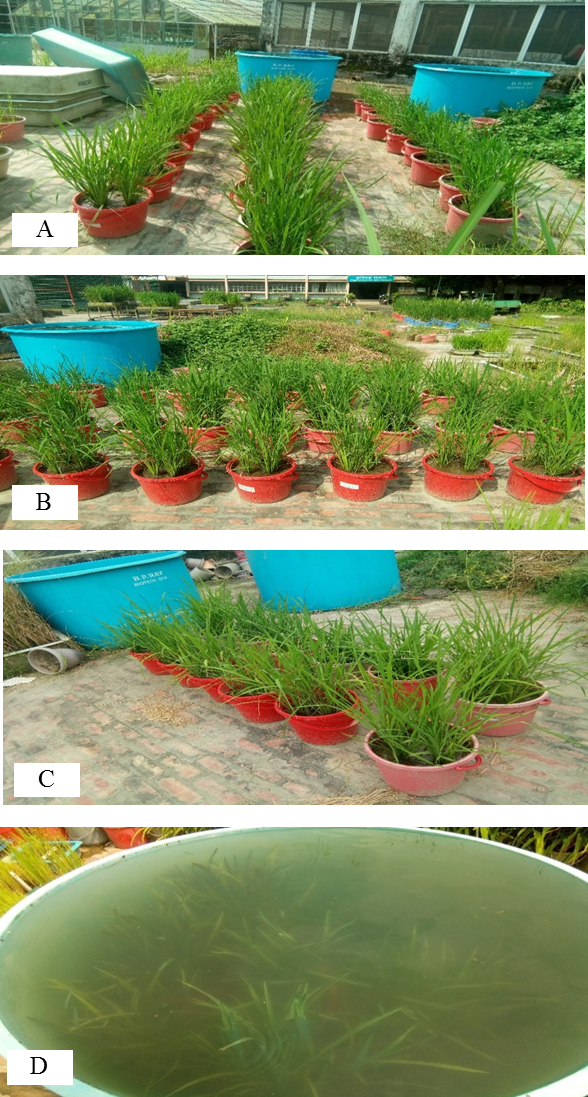
**

Figure S5: Populations of F3 generation were grown for screening at vegetative stage for submergence tolerant in artificial tank at Biotechnology division, BINA; A) Binadhan-7 × BRRI dhan52, B) Binadhan-17 × BRRI dhan52, C) Guti swarna × BRRI dhan52 and D) At submerged stage.


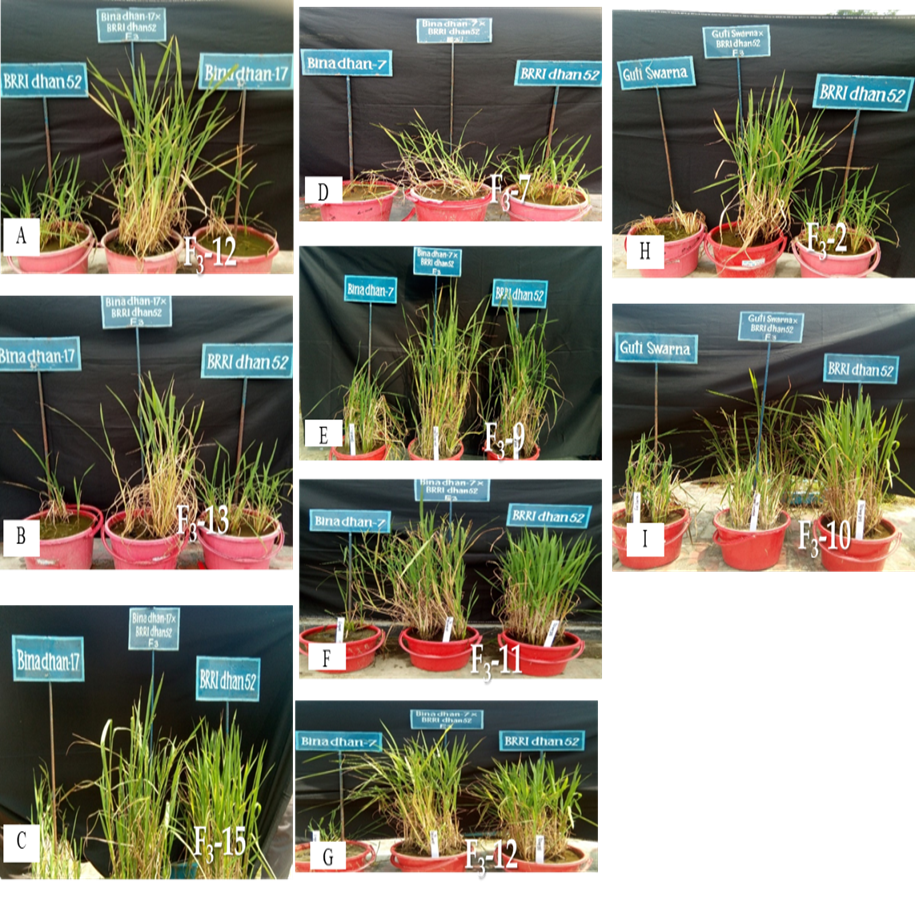


Figure S6: Phenotypic feature of the recovered plants after 21 days submergence stress in artificial tank of the cross Binadhan-17 × BRRI dhan52 at vegetative stage; A) F3-12, B) F3-13 and C) F3-15. The cross combination of Binadhan-7 × BRRI dhan52 D) F3-7, E) F3-9, F) F3-11 and G) F3-12. The cross combination of Guti swarna × BRRI dhan52 H) F3-2 and I) F3-10.


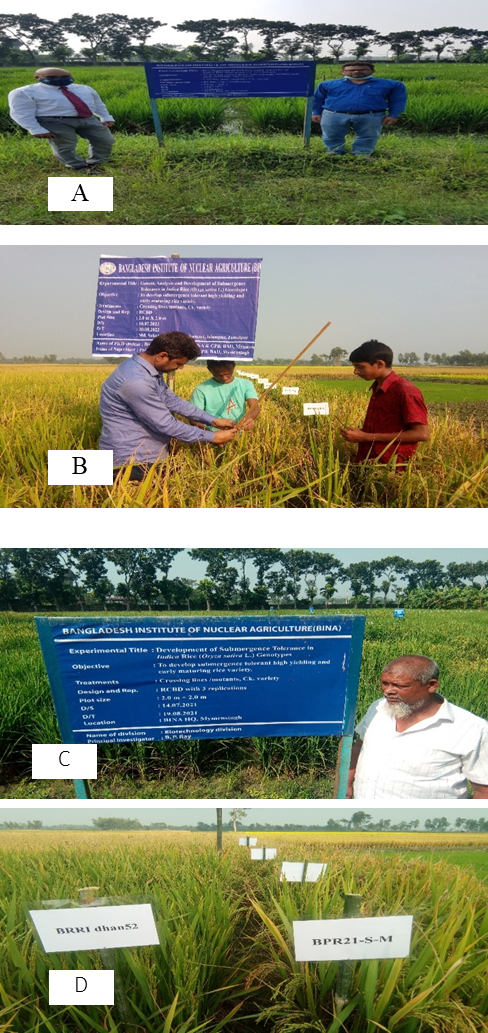


Figure S7: Adaptive performance trial of all selected lines and their checks at farmers field under submergence prone areas; A) Regional field trails at Jamalpur district, B) Rangpur district C) Kurigram district. D) Comparison for maturity of selected *Sub1* lines BPR21-S-M and BRRI dhan52.
