# Supplementary material for: Development of submergence tolerance introgression lines (ILs)-F 5 using major Sub1QTL on chro9 from BRRI dhan52 in rice (Oryza sativa L.) through Marker-Assisted Selection (MAS)
Source: Research Square preprint supplement (doi:10.21203/rs.3.rs-7306050/v1), 2025-10-15
Supplement: Supplementary file 3 [file 7ef1e5728a4cd25a18e598df.docx]

Table 6: Average performance of the genotypes regarding difference score 7 days after submergence at seedling stage

| Genotypes | Seedling stage | No. of leaf at submergence | Seedling height(cm) | Seedling weight(gm) | Seedling strength(g/cm) | Final Seedling height(cm) | Elongation (%) | Submerged duration(Days) | Ave. water depth (cm) | Survival rate (%) | Recovery ability |
| --- | --- | --- | --- | --- | --- | --- | --- | --- | --- | --- | --- |
| Nepali swarna (NS) | 30 Days | 6 | 34.00 | 1.10 | 3.23 | 40.33 | 15.69 | 7 days | 75 cm | 21 | poor |
| Sada Guti swarna (SGS) | 30 Days | 7 | 31.50 | 1.00 | 3.17 | 39.09 | 19.41 | 7 Days | 75 cm | 14 | poor |
| Ranjit swarna (RS) | 30 Days | 5 | 39.00 | 1.19 | 3.05 | 45.98 | 15.10 | 7 Days | 75 cm | 24 | poor |
| Rangina swarna (RnS) | 30 Days | 5 | 47.00 | 1.46 | 3.10 | 68.76 | 31.64 | 7 days | 75 cm | 25 | poor |
| Suman swarna (SS) | 30 Days | 6 | 39.00 | 0.68 | 1.74 | 42.15 | 7.47 | 7 Days | 75 cm | 11 | poor |
| Guti swarna (GS) | 30 Days | 5 | 34.50 | 1.43 | 4.14 | 39.61 | 12.90 | 7 Days | 75 cm | 15 | poor |
| Mamun Swarna (MS) | 30 Days | 5 | 41.00 | 1.32 | 3.21 | 45.09 | 9.07 | 7 Days | 75 cm | 15 | poor |
| BRRI dhan52 (cont.) | 30 Days | 6 | 40.00 | 1.26 | 3.15 | 51.02 | 21.59 | 7 days | 75 cm | 87 | good |
| Binadhan-7 | 30 Days | 3 | 25.50 | 0.26 | 1.01 | 27.03 | 5.66 | 7 Days | 75 cm | 12 | poor |
| Binadhan-17 | 30 Days | 4 | 27.00 | 0.42 | 1.55 | 28.92 | 6.63 | 7 Days | 75 cm | 14 | poor |
| Binadhan-7 x BRRI dhan52(F2) | 30 Days | 6 | 34.00 | 1.64 | 4.82 | 55.78 | 39.04 | 7 days | 75 cm | 96 | very good |
| Binadhan-17 x BRRI dhan52(F2) | 30 Days | 6 | 42.00 | 1.75 | 4.16 | 75.23 | 40.83 | 7 Days | 75 cm | 98 | very good |
| Guti swarna xBRRI dhan 52(F2) | 30 Days | 5 | 41.00 | 1.63 | 3.93 | 58.45 | 29.85 | 7 Days | 75 cm | 89 | good |
