# Supplementary material for: Development of submergence tolerance introgression lines (ILs)-F 5 using major Sub1QTL on chro9 from BRRI dhan52 in rice (Oryza sativa L.) through Marker-Assisted Selection (MAS)
Source: Research Square preprint supplement (doi:10.21203/rs.3.rs-7306050/v1), 2025-10-15
Supplement: Supplementary file 4 [file e4966af5b982eb517fb35890.docx]

Table S1: List of primers used for molecular characterization as F1 & F4 confirmations on Chro9

**Fig. 2: Ethylene mediated physiological mechanism of submergence tolerant genotypes in rice**

| SN | Indel Primers | Position | | Allele Size | Forward | Reverse | Annealing Temperature (oC) | Chro | Repeat motif |
| --- | --- | --- | --- | --- | --- | --- | --- | --- | --- |
| (cM) | (Mb) |
| 1. | Sub1C173 | 24.6 | 6.2 Mb  (Exon of Sub1C) | 166 - 178 | CTACTTCAATGTCACCAACG | TAGAAGATGGAAGACCTGAT | 58 | 9 | (AGC)10 |
| 2 | ERF3 | 4.4-6.8 | 6.2 Mb | 166-178 | AACGCCAAGACCAACTTCC | AGGAGGCTGTCCATCAGGT | 58 | 9 |  |
| 3 | SC3/ RM8300 | 6.8-10.0 | 6.6 Mb | 211-217 | GCTAGTGCAGGGTTGACACA | CTCTGGCCGTTTCATGGTAT | 55 | 9 | (ACCATTAT)3 |
| 4 | SC32/  RM23668 | 0.0-0.5 | 0.6 Mb | 159 | CAACTAGCCCTACCGTGCAT | CGTGTTAAAGCAGCGAAACA | 55 | 9 | (ACG)10 |

Table S2: Estimated genotypes at locus SC32/ RM23668 on the top of chromosome 9 of three crosses including Binadhan-7 (P1)/ BRRI dhan52 (P2), Binadhan-17 (P1)/ BRRI dhan52 (P2) and Guti Swarna(P1)/ BRRI dhan52(P2).

| SL# | Plant numbers | Allele | | Banding pattern | Cross combinations | | |
| --- | --- | --- | --- | --- | --- | --- | --- |
| (A)  169 bp | (B)  159 bp | Binadhan-7/ BRRI dhan52  (F1) | Binadhan-17 / BRRI dhan52  (F1) | Guti Swarna/ BRRI dhan52  (F1) |
| 1 | P1 |  | + | 1 | 1 | 1 | 1 |
| 2 | P2 | + |  | 2 | 2 | 2 | 2 |
| 3 | F2-1 | 0 | 0 | 0 | 0 | 0 | 0 |
| 4 | F2-2 | + | + | 3 | 3 | 3 | 3 |
| 5 | F2-3 | + | + | 3 | 3 | 3 | 0 |
| 6 | F2-4 | + | + | 3 | 3 | 3 | 3 |
| 7 | F2-5 | + | + | 3 | 3 | 3 | 3 |
| 8 | F2-6 | + | + | 3 | 3 | 3 | 1 |
| 9 | F2-7 | + | + | 3 | 3 | 3 | 3 |
| 10 | F2-8 | 0 | 0 | 0 | 0 | 0 | 0 |
| 11 | F2-9 | + | + | 3 | 3 | 0 | 3 |
| 12 | F2-10 | 0 | 0 | 0 | 0 | 3 | 3 |
| 13 | F2-11 | + | + | 3 | 3 | 3 | 0 |
| 14 | F2-12 | + | + | 3 | 3 | 3 | 0 |
| 15 | F2-13 | + | + | 3 | 3 | 3 | 3 |
| 16 | F2-14 | 0 | 0 | 0 | 0 | 0 | 3 |
| 17 | F2-15 | + | + | 3 | 3 | 3 | 0 |

**Here, P1=Female parent (Homozygous band =1), P2=Donor parent (Homozygous band =2), F1= Heterozygous plant (3) and No Band=0**

Table S3: Allele number, frequency, genetic diversity and PIC of 16 rice genotypes for 16 SSR primers

| SL No. | Marker | Ave. Allele Freq (%) | No. of Allele | Gene Diversity | PIC |
| --- | --- | --- | --- | --- | --- |
| 1 | RM296 | 0.143 | 7 | 0.844 | 0.824 |
| 2 | SC32/RM23668 | 0.143 | 7 | 0.797 | 0.770 |
| 3 | SC34/RM23679 | 0.125 | 8 | 0.836 | 0.816 |
| 4 | SSR1 | 0.143 | 7 | 0.766 | 0.735 |
| 5 | SC11/RM23770 | 0.100 | 10 | 0.875 | 0.862 |
| 6 | RM495 | 0.125 | 8 | 0.836 | 0.816 |
| 7 | RM316 | 0.091 | 11 | 0.891 | 0.881 |
| 8 | RM1178 | 0.125 | 8 | 0.852 | 0.834 |
| 9 | RM1115 | 0.100 | 10 | 0.844 | 0.829 |
| 10 | RM126 | 0.125 | 8 | 0.844 | 0.825 |
| 11 | RM5799 | 0.125 | 8 | 0.828 | 0.809 |
| 12 | RM286 | 0.111 | 9 | 0.867 | 0.853 |
| 13 | RM153 | 0.091 | 11 | 0.875 | 0.864 |
| 14 | RM8300 | 0.143 | 7 | 0.836 | 0.815 |
| 15 | Sub1C173 | 0.111 | 9 | 0.875 | 0.862 |
| 16 | ERF3 | 0.091 | 11 | 0.891 | 0.881 |
|  | Mean | 0.118 | 8.688 | 0.847 | 0.830 |
